# Supplementary material
Source: Springer Nature journal article supplement (https://www.springermedizin.de/resource/supplementary/12943_2010_692_MOESM9_ESM.pdf/9554600)

# CD56<sup>+</sup>Bcl2<sup>+</sup>casp8<sup>-</sup>

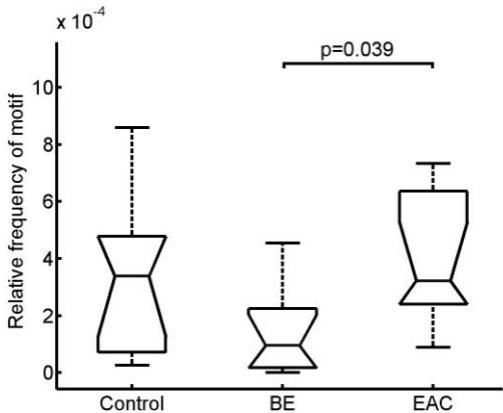

Supplement: MOESM9 [file 9554600]
